# Supplementary material for: Estimating Copy Number and Allelic Variation at the Immunoglobulin Heavy Chain Locus Using Short Reads
Source: PubMed Central journal article supplement (PMC5025152; doi:10.1371/journal.pcbi.1005117), 2016-09-15
Supplement: pcbi.1005117.s003.pdf [file pcbi.1005117.s003.pdf]

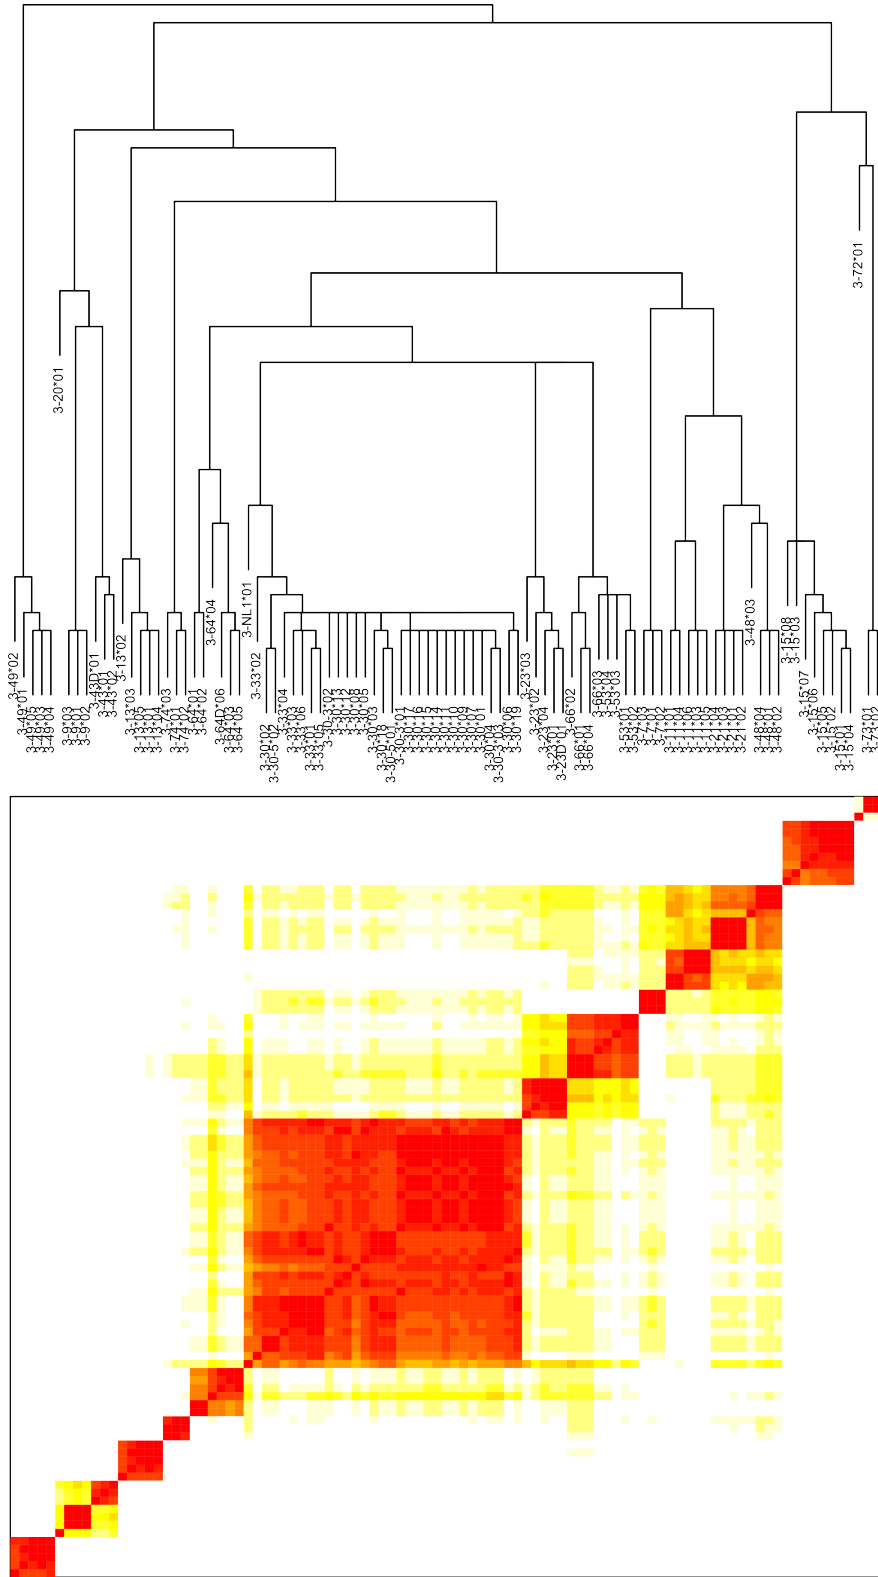

**S3 Figure: Hierarchical clustering applied to Hamming distance between all family 3 alleles.** Allele labels are in cladogram above matrix. Heatmap color scale is same as in the main text, with red=0% nucleotide differences, white=10% or more.
