# Supplementary material for: Estimating Copy Number and Allelic Variation at the Immunoglobulin Heavy Chain Locus Using Short Reads
Source: PubMed Central journal article supplement (PMC5025152; doi:10.1371/journal.pcbi.1005117), 2016-09-15
Supplement: pcbi.1005117.s012.pdf [file pcbi.1005117.s012.pdf]

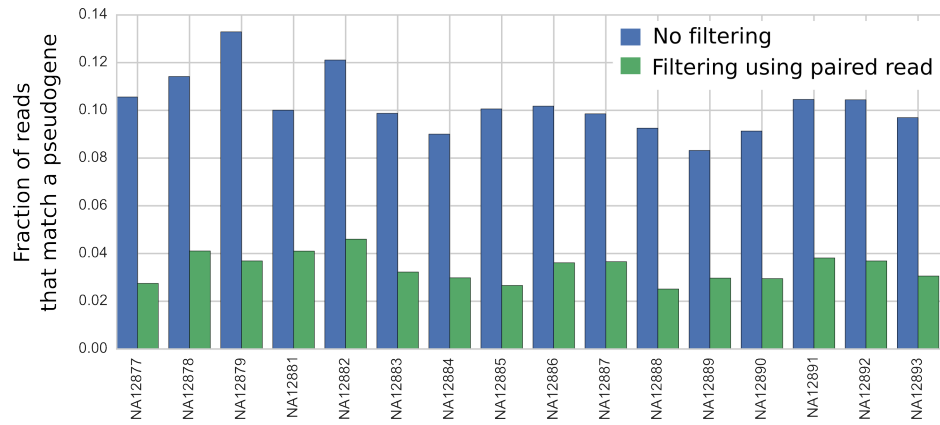

**S12 Figure: Filtering using mate pair information decreases reads from pseudogenes.** For each individual, we calculated the fraction of reads that more closely match a pseudogene than an IMGT allele (blue). We then did the same calculation after filtering reads using the location of the paired read (green).
