# Supplementary material for: Estimating Copy Number and Allelic Variation at the Immunoglobulin Heavy Chain Locus Using Short Reads
Source: PubMed Central journal article supplement (PMC5025152; doi:10.1371/journal.pcbi.1005117), 2016-09-15
Supplement: pcbi.1005117.s016.pdf [file pcbi.1005117.s016.pdf]

**Table S2: GRCh37 and GRCh38 in terms of our gene clusters.** When there is one allele listed for a gene cluster, that gene cluster is considered to be in single copy. If there are two alleles listed, the gene cluster has two copies.

| Gene cluster | GRCh37           | GRCh38            |
|--------------|------------------|-------------------|
| 6-1          | 6-1*01           | 6-1*01            |
| 1-2          | 1-2*02           | 1-2*04            |
| 1-3          | 1-3*02           | 1-3*01            |
| 4-4*01       | -                | 4-4*02            |
| 7-4-1        |                  | 7-4-1*01          |
| 2-5          | 2-5*01           | 2-5*02            |
| 3-7          | 3-7*01           | 3-7*03            |
| 1-8          | 1-8*01           | -                 |
| 3-9          | 3-9*01           | -                 |
| 5-10-1       | -                | 5-10-1*03         |
| 3-11         | 3-11*01          | 3-11*06           |
| 3-13         | 3-13*01          | 3-13*05           |
| 3-15         | 3-15*01          | 3-15*01           |
| 1-18         | 1-18*01          | 1-18*04           |
| 3-20         | 3-20*01          | 3-20*02           |
| 3-21         | 3-21*01          | 3-21*01           |
| 3-23         | 3-23*01          | 3-23*04           |
| 1-24         | 1-24*01          | 1-24*01           |
| 2-26         | 2-26*01          | 2-26*01           |
| 4-28         | 4-28*01          | 4-28*07           |
| 4-30-2       | -                | 4-30-2*01         |
| 3-30         | 3-33*01, 3-30*03 | 3-30*18, 3-33*01  |
| 4-31         | 4-31*02          | -                 |
| 4-34         | 4-34*01          | 4-34*01           |
| 4-39         | 4-39*01          | 4-39*01           |
| 3-43         | 3-43*01          | 3-43*01           |
| 1-45         | 1-45*02          | 1-45*02           |
| 1-46         | 1-46*01          | 1-46*01           |
| 3-48         | 3-48*02          | 3-48*03           |
| 3-49         | 3-49*03          | 3-49*04           |
| 5-51         | 5-51*01          | 5-51*01           |
| 3-53         | 3-53*01, 3-66*03 | 3-53*02, 3-66*03  |
| 1-58         | 1-58*02          | 1-58*01           |
| 4-59         | 4-4*07, 4-59*01  | 4-59*01           |
| 4-61         | 4-61*08          | 4-61*01           |
| 3-64         | 3-64*02          | 3-64*02, 3-64D*06 |
| 1-69-2       | -                | 1-69-2*01         |
| 1-69         | 1-69*06          | 1-69D*01, 1-69*06 |
| 2-70         | 2-70*13          | 2-70D*04, 2-70*01 |
| 3-72         | 3-72*01          | 3-72*01           |
| 3-73         | 3-73*02          | 3-73*02           |
| 3-74         | 3-74*01          | 3-74*01           |
