# Supplementary material for: Estimating Copy Number and Allelic Variation at the Immunoglobulin Heavy Chain Locus Using Short Reads
Source: PLOS journal article supplement (doi:10.1371/journal.pcbi.1005117), 2016-09-15
Supplement: S5 (10.1371/journal.pcbi.1005117.s005) [file journal.pcbi.1005117.s005]

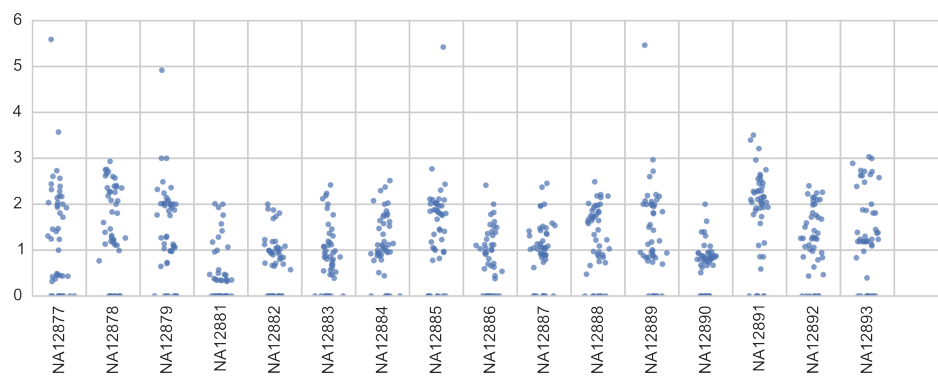

**S5 Figure: Dotplots of estimated copy number for each individual in the Platinum Genomes dataset.** The data points are the same as in Fig. 4 but grouped by individuals rather than gene cluster. Y axis is normalized read coverage depth.
